# Supplementary material for: Eco-evolutionary response of soil viral communities to land use changes
Source: Research Square preprint supplement (doi:10.21203/rs.3.rs-1415921/v1), 2022-03-24
Supplement: Supplementary file 1 [file 0eff91aa404784175163761f.pdf]

## Reporting Summary

Nature Portfolio wishes to improve the reproducibility of the work that we publish. This form provides structure for consistency and transparency in reporting. For further information on Nature Portfolio policies, see our [Editorial Policies](#) and the [Editorial Policy Checklist](#).

### Statistics

For all statistical analyses, confirm that the following items are present in the figure legend, table legend, main text, or Methods section.

n/a Confirmed

- ☐ ☒ The exact sample size ( $n$ ) for each experimental group/condition, given as a discrete number and unit of measurement
- ☐ ☒ A statement on whether measurements were taken from distinct samples or whether the same sample was measured repeatedly
- ☐ ☒ The statistical test(s) used AND whether they are one- or two-sided  
*Only common tests should be described solely by name; describe more complex techniques in the Methods section.*
- ☐ ☒ A description of all covariates tested
- ☒ ☐ A description of any assumptions or corrections, such as tests of normality and adjustment for multiple comparisons
- ☐ ☒ A full description of the statistical parameters including central tendency (e.g. means) or other basic estimates (e.g. regression coefficient) AND variation (e.g. standard deviation) or associated estimates of uncertainty (e.g. confidence intervals)
- ☒ ☐ For null hypothesis testing, the test statistic (e.g.  $F$ ,  $t$ ,  $r$ ) with confidence intervals, effect sizes, degrees of freedom and  $P$  value noted  
*Give  $P$  values as exact values whenever suitable.*
- ☒ ☐ For Bayesian analysis, information on the choice of priors and Markov chain Monte Carlo settings
- ☒ ☐ For hierarchical and complex designs, identification of the appropriate level for tests and full reporting of outcomes
- ☐ ☒ Estimates of effect sizes (e.g. Cohen's  $d$ , Pearson's  $r$ ), indicating how they were calculated

*Our web collection on [statistics for biologists](#) contains articles on many of the points above.*

### Software and code

Policy information about [availability of computer code](#)

Data collection We used our basic data

Data analysis The code have been deposited in <https://github.com/liaohu1231/Virome>

For manuscripts utilizing custom algorithms or software that are central to the research but not yet described in published literature, software must be made available to editors and reviewers. We strongly encourage code deposition in a community repository (e.g. GitHub). See the Nature Portfolio [guidelines for submitting code & software](#) for further information.

### Data

Policy information about [availability of data](#)

All manuscripts must include a [data availability statement](#). This statement should provide the following information, where applicable:

- Accession codes, unique identifiers, or web links for publicly available datasets
- A description of any restrictions on data availability
- For clinical datasets or third party data, please ensure that the statement adheres to our [policy](#)

Reads from Illumina viromes sequencing were submitted to the NCBI under the project PRJNA691683. Reads from Illumina metagenomes sequencing were submitted to the NCBI under the project PRJNA746419. The database LVD have been deposited in figshare (10.6084/m9.figshare.19108391).

## Field-specific reporting

Please select the one below that is the best fit for your research. If you are not sure, read the appropriate sections before making your selection.

☐ Life sciences ☐ Behavioural & social sciences ☒ Ecological, evolutionary & environmental sciences

For a reference copy of the document with all sections, see [nature.com/documents/nr-reporting-summary-flat.pdf](https://www.nature.com/documents/nr-reporting-summary-flat.pdf)

## Ecological, evolutionary & environmental sciences study design

All studies must disclose on these points even when the disclosure is negative.

|                                   |                                                                                                                                                                                                                                                                                                                                                                                                                |
|-----------------------------------|----------------------------------------------------------------------------------------------------------------------------------------------------------------------------------------------------------------------------------------------------------------------------------------------------------------------------------------------------------------------------------------------------------------|
| Study description                 | we conducted an in-depth characterization of soil viral composition and spatial distribution across five land use types including forest, paddy field, vegetable field, urban park, and road verge through viromic analysis. Host-linked interactions, lysogenicity, and microdiversity were further investigated to illustrate the ecological and evolutionary adaptation of soil virome to land use changes. |
| Research sample                   | Samples were collected from soil with various types of uses, including forest, paddy field and vegetable field, urban park and road verge in Xiamen, China on Jul 2020, which were further grouped into three land use zones as forest zone (FO), agricultural zone (AG), and urban green space zone (UG).                                                                                                     |
| Sampling strategy                 | These soils represent the major land use types, and are closely related to anthropogenic activities. Each land use type was consisted of five locations, and five replicate topsoil (0-20 cm) samples were collected from each location, resulting in a total of 25 soil samples.                                                                                                                              |
| Data collection                   | Soil viral DNA was extracted and sequenced. Physi-chemical properties of soil was measured in our lab. All the data were collected by the first author Hi Liao.                                                                                                                                                                                                                                                |
| Timing and spatial scale          | Time:Jul 2020<br>Spatial scale: Xiamen, China                                                                                                                                                                                                                                                                                                                                                                  |
| Data exclusions                   | <i>If no data were excluded from the analyses, state so OR if data were excluded, describe the exclusions and the rationale behind them, indicating whether exclusion criteria were pre-established.</i>                                                                                                                                                                                                       |
| Reproducibility                   | All replicate soil samples were successful for DNA extraction and sequencing.                                                                                                                                                                                                                                                                                                                                  |
| Randomization                     | We collected soil sample from locations with various land use, replicate samples were randomly collected.                                                                                                                                                                                                                                                                                                      |
| Blinding                          | Soil viral DNA extraction and measurement of physi-chemical properties were conducted by Hu Li, Xin-Yuan Zhou, Qiu-Ping Luo, Xin-Li An, Hu Liao collected data for analysis.                                                                                                                                                                                                                                   |
| Did the study involve field work? | <input checked="" type="checkbox"/> Yes <input type="checkbox"/> No                                                                                                                                                                                                                                                                                                                                            |

## Field work, collection and transport

|                        |                                                                                                             |
|------------------------|-------------------------------------------------------------------------------------------------------------|
| Field conditions       | Soil samples were collected on Jul 2020 at sunny days. The temperature was 32-35 degree.                    |
| Location               | Soil samples were collected in Xiamen, China. N24°23' 24°54', E117°53' 118°26', Elevation 5-40 m            |
| Access & import/export | Sample collection was permitted by the Municipal Parks bureau of Xiamen and farmers of agricultural fields. |
| Disturbance            | Excess soil sample was refilled to the sampling place.                                                      |

## Reporting for specific materials, systems and methods

We require information from authors about some types of materials, experimental systems and methods used in many studies. Here, indicate whether each material, system or method listed is relevant to your study. If you are not sure if a list item applies to your research, read the appropriate section before selecting a response.

## Materials & experimental systems

|                                     |                                                        |
|-------------------------------------|--------------------------------------------------------|
| n/a                                 | Involved in the study                                  |
| <input checked="" type="checkbox"/> | <input type="checkbox"/> Antibodies                    |
| <input checked="" type="checkbox"/> | <input type="checkbox"/> Eukaryotic cell lines         |
| <input checked="" type="checkbox"/> | <input type="checkbox"/> Palaeontology and archaeology |
| <input checked="" type="checkbox"/> | <input type="checkbox"/> Animals and other organisms   |
| <input checked="" type="checkbox"/> | <input type="checkbox"/> Human research participants   |
| <input checked="" type="checkbox"/> | <input type="checkbox"/> Clinical data                 |
| <input checked="" type="checkbox"/> | <input type="checkbox"/> Dual use research of concern  |

## Methods

|                                     |                                                 |
|-------------------------------------|-------------------------------------------------|
| n/a                                 | Involved in the study                           |
| <input checked="" type="checkbox"/> | <input type="checkbox"/> ChIP-seq               |
| <input checked="" type="checkbox"/> | <input type="checkbox"/> Flow cytometry         |
| <input checked="" type="checkbox"/> | <input type="checkbox"/> MRI-based neuroimaging |
