# Supplementary figures and images for: Eco-evolutionary response of soil viral communities to land use changes
Source: Research Square preprint supplement (doi:10.21203/rs.3.rs-1415921/v1), 2022-03-24

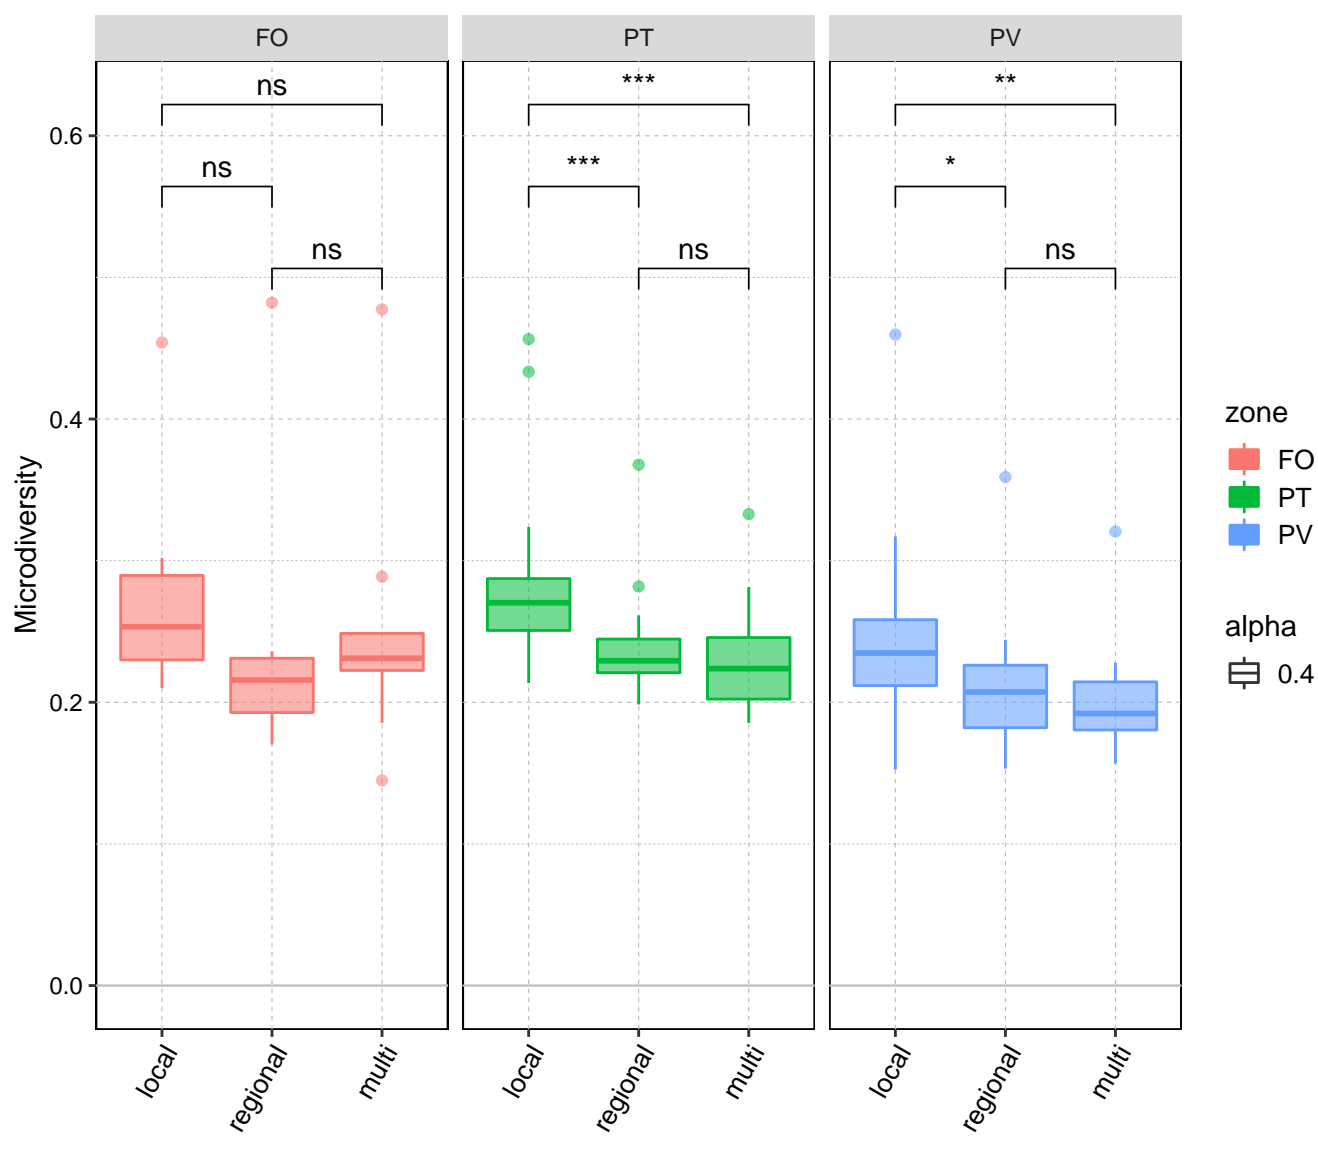

Supplement: Supplementary file 2 [file pNpS_populations_zone.pdf › script/microdiverisity/pNpS_populations_zone.pdf]
